# Supplementary material
Source: Springer Nature journal article supplement (https://www.springermedizin.de/resource/supplementary/12875_2013_959_MOESM2_ESM.pdf/9435504)

# SUA control

In range

Above target

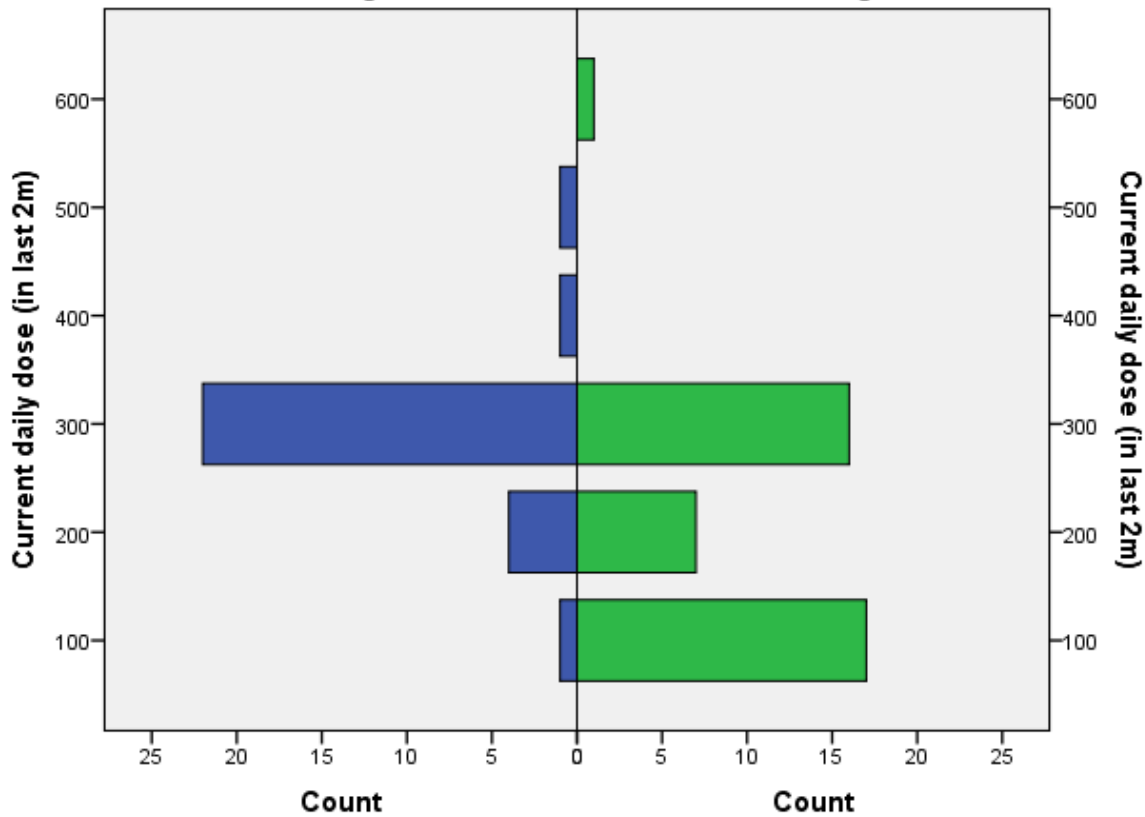

Supplement: MOESM2 [file 9435504]
